# Supplementary material for: DetecDiv, a generalist deep-learning platform for automated cell division tracking and survival analysis
Source: eLife journal article supplement (doi:10.7554/elife.79519), 2022-08-17

# Figure 2 - Figure supplement 2

**A**GoogleNet (=InceptionV1) (CNN)

|             |       |            |       |       |       |       |       |        |      |
|-------------|-------|------------|-------|-------|-------|-------|-------|--------|------|
| Groundtruth | clog  | 3851       | 68    | 32    | 21    |       |       | 97.0%  | 3.0% |
|             | dead  | 365        | 11896 |       | 156   | 15    | 70    | 95.2%  | 4.8% |
|             | empty | 4          |       | 276   |       | 2     |       | 97.9%  | 2.1% |
|             | large | 12         | 30    |       | 16590 | 1494  | 2     | 91.5%  | 8.5% |
|             | small |            | 1     |       | 327   | 6134  | 4     | 94.9%  | 5.1% |
|             | unbud | 6          | 2     |       | 38    | 88    | 2721  | 95.3%  | 4.7% |
| Precision   |       | 90.9%      | 99.2% | 89.6% | 96.8% | 79.3% | 97.3% |        |      |
|             |       | 9.1%       | 0.8%  | 10.4% | 3.2%  | 20.7% | 2.7%  |        |      |
|             |       | clog       | dead  | empty | large | small | unbud | Recall |      |
|             |       | Prediction |       |       |       |       |       |        |      |

**C**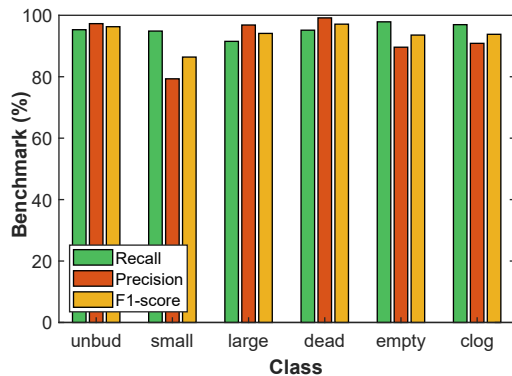**B**GoogleNet (CNN) + LSTM

|             |       |      |       |     |       |      |      |       |      |
|-------------|-------|------|-------|-----|-------|------|------|-------|------|
| Groundtruth | clog  | 3832 | 100   | 35  | 4     |      | 1    | 96.5% | 3.5% |
|             | dead  | 122  | 12069 |     | 125   |      | 186  | 96.5% | 3.5% |
|             | empty |      |       | 279 |       | 3    |      | 98.9% | 1.1% |
|             | large | 1    | 5     |     | 17293 | 823  | 6    | 95.4% | 4.6% |
|             | small |      | 3     |     | 368   | 6054 | 41   | 93.6% | 6.4% |
|             | unbud |      |       |     | 4     | 31   | 2820 | 98.8% | 1.2% |

|           |       |       |       |       |       |       |
|-----------|-------|-------|-------|-------|-------|-------|
| Precision | 96.9% | 99.1% | 88.9% | 97.2% | 87.6% | 92.3% |
|           | 3.1%  | 0.9%  | 11.1% | 2.8%  | 12.4% | 7.7%  |

|            |      |       |       |       |       |
|------------|------|-------|-------|-------|-------|
| clog       | dead | empty | large | small | unbud |
| Prediction |      |       |       |       |       |

|        |  |  |  |  |  |
|--------|--|--|--|--|--|
| Recall |  |  |  |  |  |
|--------|--|--|--|--|--|

**D**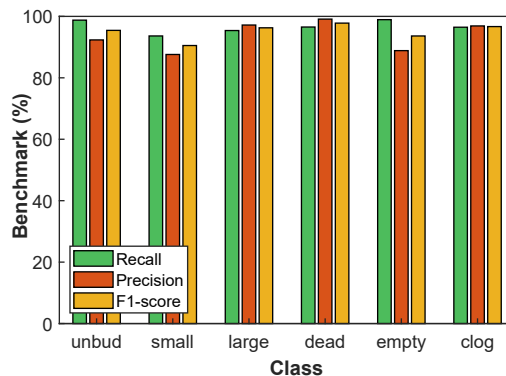

Supplement: supp [file elife_poa_e79519_Figure_2_figure_supplement_2.pdf › elife_poa_e79519_Figure_2_figure_supplement_2.pdf]
