# Supplementary material for: DetecDiv, a generalist deep-learning platform for automated cell division tracking and survival analysis
Source: eLife. 2022 Aug 17;11:e79519. doi: 10.7554/eLife.79519 (PMC9444243; doi:10.7554/eLife.79519)
Supplement: Figure 2—source data 1. [file elife-79519-fig2-data1.xlsx]

## Sheet: CNN+LSTM for divisions
Supplementary Table 2
CNN	Value			LSTM bidirectional	Value
ROIs	200			ROIs	200
Total images	200 000			Total data points	200 000
classes	unbudded, small, large dead, empty, clogged			classes	unbudded, small, large dead, empty, clogged
Network	Googlenet
method	adam			method	adam
split	0.7			split	0.7
freeze	n			freeze	n
ExecutionEnvironment	multi-gpu			ExecutionEnvironment	multi-gpu
GradientDecayFactor	0.9			GradientDecayFactor	0.9
SquaredGradientDecayFactor	0.999			SquaredGradientDecayFactor	0.999
Epsilon	1e-08			Epsilon	1e-08
InitialLearnRate	0.0003			InitialLearnRate	0.0003
LearnRateScheduleSettings				LearnRateScheduleSettings
	Method	piecewise			Method	piecewise
	DropRateFactor	0.9			DropRateFactor	0.9
	DropPeriod	10			DropPeriod	10
L2Regularization	1e-05			L2Regularization	1e-05
GradientThresholdMethod	l2norm			GradientThresholdMethod	l2norm
MaxEpochs	6			MaxEpochs	50
MiniBatchSize	128			MiniBatchSize	8
ValidationPatience	Inf			ValidationPatience	Inf
Shuffle	every-epoch			Shuffle	every-epoch
TranslateAugmentation	-5 5
RotateAugmentation	-30 30
