# Supplementary material for: DetecDiv, a generalist deep-learning platform for automated cell division tracking and survival analysis
Source: eLife. 2022 Aug 17;11:e79519. doi: 10.7554/eLife.79519 (PMC9444243; doi:10.7554/eLife.79519)
Supplement: Figure 4—source data 1. [file elife-79519-fig4-data1.xlsx]

## Sheet: SEP
Supplementary Table 3: LSTM for the detection of cell-cycle slowdown
LSTM	Value
ROIs	200
Total data points	90092
classes	unbudded, small, large dead, empty, clogged
method	adam
split	0.7
freeze	n
ExecutionEnvironment	multi-gpu
GradientDecayFactor	0.9
SquaredGradientDecayFactor	0.999
Epsilon	1e-08
InitialLearnRate	0.0003
LearnRateScheduleSettings
	Method	piecewise
	DropRateFactor	0.9
	DropPeriod	10
L2Regularization	1e-05
GradientThresholdMethod	l2norm
MaxEpochs	50
MiniBatchSize	8
ValidationPatience	Inf
Shuffle	every-epoch
