# Supplementary material for: DetecDiv, a generalist deep-learning platform for automated cell division tracking and survival analysis
Source: eLife. 2022 Aug 17;11:e79519. doi: 10.7554/eLife.79519 (PMC9444243; doi:10.7554/eLife.79519)
Supplement: Figure 5—source data 1. [file elife-79519-fig5-data1.xlsx]

## Sheet: CNN for cell bodies
Supplementary Table 4: training parameters for cell body segmentation
DeepLab v3+	Value
Images	1404
classes	Background, Mother, Other
Network	resnet50
method	adam
split	0.9
freeze	n
ExecutionEnvironment	multi-gpu
GradientDecayFactor	0.9
SquaredGradientDecayFactor	0.999
Epsilon	1e-08
InitialLearnRate	0.00001
LearnRateScheduleSettings
	Method	piecewise
	DropRateFactor	0.7
	DropPeriod	2
L2Regularization	0
GradientThresholdMethod	l2norm
MaxEpochs	10
MiniBatchSize	8
ValidationPatience	500
Shuffle	every-epoch
TranslateAugmentation	-7 7
RotateAugmentation	-20 20
