# Supplementary material for: DetecDiv, a generalist deep-learning platform for automated cell division tracking and survival analysis
Source: eLife journal article supplement (doi:10.7554/elife.79519), 2022-08-17

**Figure 1 - figure supplement 1**

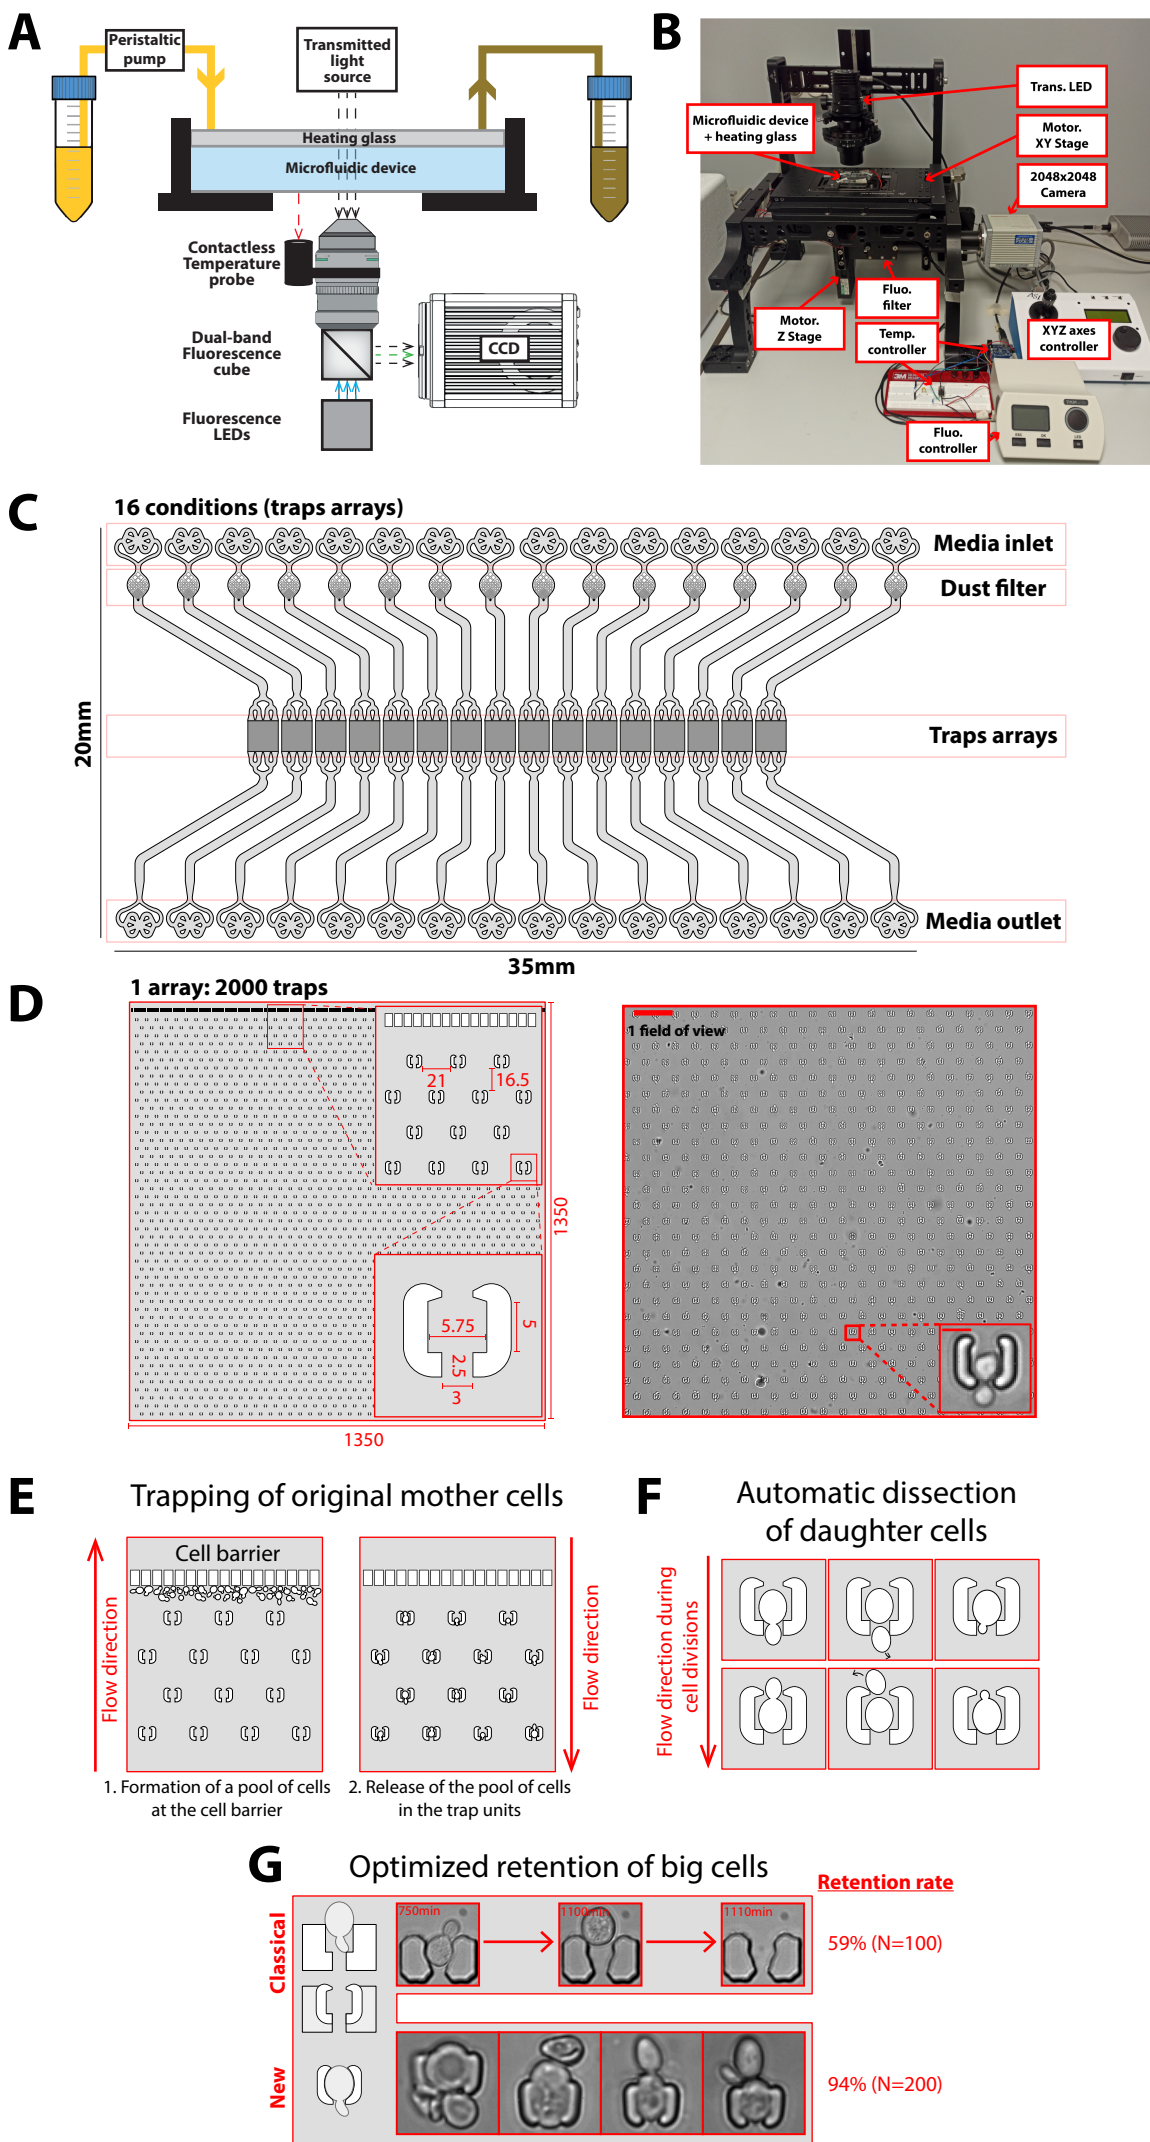

Supplement: supp [file elife_poa_e79519_Figure_1_figure_supplement_1.pdf › elife_poa_e79519_Figure_1_figure_supplement_1.pdf]
