# Supplementary material for: DetecDiv, a generalist deep-learning platform for automated cell division tracking and survival analysis
Source: eLife journal article supplement (doi:10.7554/elife.79519), 2022-08-17

**Figure 2 - Figure supplement 3**

**Prediction - Groundtruth**

Unbudded ☐ ☐  
Small ☒ ☒  
Large ☐ ☐  
Dead ☐ ☐  
Empty ☐ ☐  
Clogged ☐ ☐

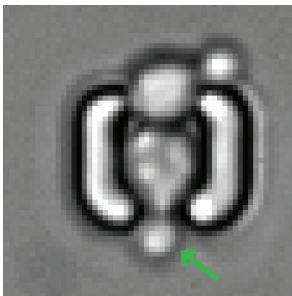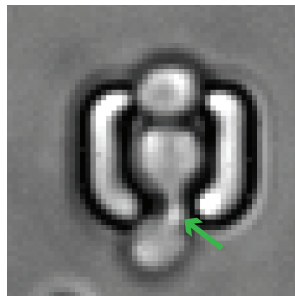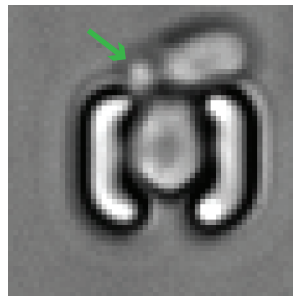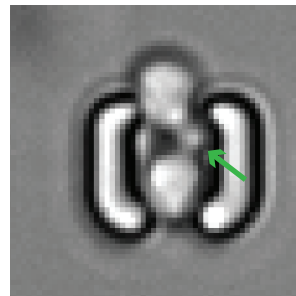

**Prediction - Groundtruth**

Unbudded ☐ ☐  
Small ☐ ☐  
Large ☒ ☒  
Dead ☐ ☐  
Empty ☐ ☐  
Clogged ☐ ☐

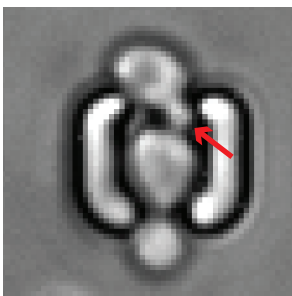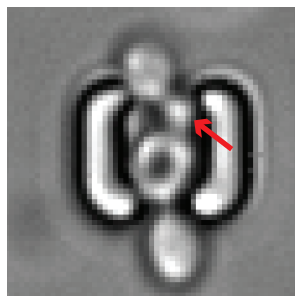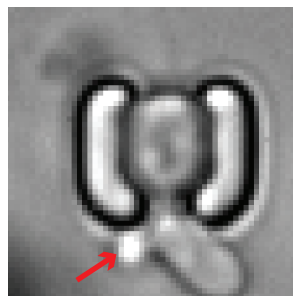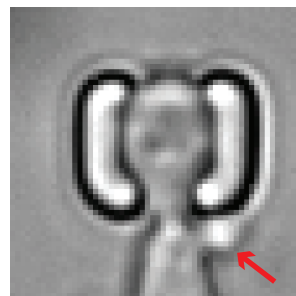

Supplement: supp [file elife_poa_e79519_Figure_2_figure_supplement_3.pdf › elife_poa_e79519_Figure_2_figure_supplement_3.pdf]
