# Supplementary material for: DetecDiv, a generalist deep-learning platform for automated cell division tracking and survival analysis
Source: eLife journal article supplement (doi:10.7554/elife.79519), 2022-08-17

# Figure 6 -Figure supplement 1

Validation: correlation times of death

0.5mM H<sub>2</sub>O<sub>2</sub>

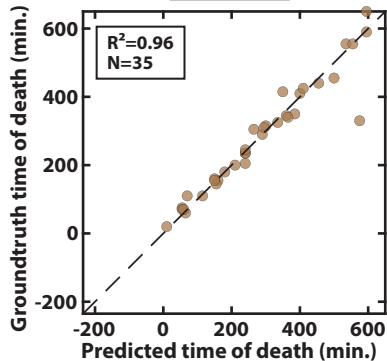

Validation: confusion matrix of survival status

at the end of the experiment - 0.5mM H<sub>2</sub>O<sub>2</sub>

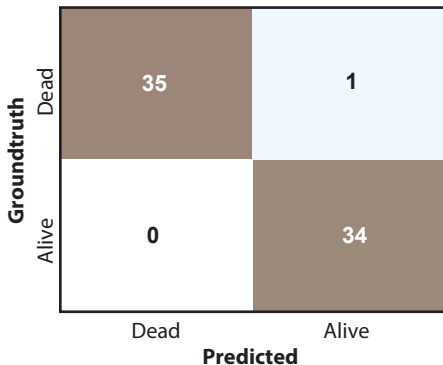

Supplement: supp [file elife_poa_e79519_Figure_6_figure_supplement_1.pdf › elife_poa_e79519_Figure_6_figure_supplement_1.pdf]
