# Supplementary material for: DetecDiv, a generalist deep-learning platform for automated cell division tracking and survival analysis
Source: eLife journal article supplement (doi:10.7554/elife.79519), 2022-08-17
Supplement: supp [file elife_poa_e79519_Supplementary_file_1.xlsx]

## Sheet: Feuille 1
Supplementary Table 1: Strain Table
Name	Mat	Background	Genotype	Origin
SF1.39	alpha	S288C	BY4742 his3delta1 leu2delta0 lys2delta0 TRP1 ura3delta0	Euroscarf
SF1.46	alpha	S288C	YDL042c::KanMX4 his3delta1 leu2delta0 lys2delta0 ura3delta0	Euroscarf
SF1.47	alpha	S288C	YDR110w::KanMX4 his3delta1 leu2delta0 lys2delta0 ura3delta0	Euroscarf
YAM4.38	alpha	S288C	HTB2-NeonGreen-CaURA his3-1 leu2-3 URA3 met15.0	Charvin lab
YAM7.19	alpha	S288C	TSA1::TSA1-GFP-HIS3 ADE2 his3-1 leu2-3 LYS2 TRP1 ura3-1 met15.0	Euroscarf
