# Supplementary material for: DetecDiv, a generalist deep-learning platform for automated cell division tracking and survival analysis
Source: eLife. 2022 Aug 17;11:e79519. doi: 10.7554/eLife.79519 (PMC9444243; doi:10.7554/eLife.79519)
Supplement: Supplementary file 2. [file elife-79519-supp2.xlsx]

## Sheet: Feuil1
Type	Description	Input	Output	Reference figures in article
Models used in the present article
Image classification	CNN : GoogleNet, Resnet50, etc.	Individual images	M user-defined classes	Fig. 2 ("CNN"), 2S1-2. Table T2
Image sequence classification	Combined CNN/LSTM network for sequence-to-sequence classification	Sequence of N images	N (frames) x M (user-defined classes)	Fig. 2 ("CNN/LSTM"),2 S2. Table T2
Timeseries classification	LSTM network for sequence-to-sequence classification	N (frames) x L vector	N (frames) x M (user-defined classes)	Fig. 4 and 4S1. Table T3
Pixel classification (semantic segmentation)	Deeplab v3+ (with GoogleNet, Resnet50, etc. encoder)	Individual images	Labeled images (M user -defined classes)	Fig. 5, 5S1-3. Table T4 and T5
Additional models available
Image sequence classification	Combined CNN/LSTM network for sequence-to-one classification	Sequence of N images	M (user-defined classes)	N/A
Image regression	CNN : GoogleNet, Resnet50, etc.	Individual images	1 number	N/A
Image sequence regression	Combined CNN/LSTM network for sequence-to-sequence regression	Sequence of N images	N (frames) x 1 number	N/A
Timeseries classification	LSTM network for sequence-to-one classification	N (frames) x L vector	M (user-defined classes)	N/A
Timeseries regression	LSTM network for sequence-to-sequence regression	N (frames) x L vector	N (frames) x 1 number	N/A
Timeseries regression	LSTM network for sequence-to-one regression	N (frames) x L vector	1 number	N/A
