# Supplementary figures and images for: DetecDiv, a generalist deep-learning platform for automated cell division tracking and survival analysis
Source: eLife journal article supplement (doi:10.7554/elife.79519), 2022-08-17

**Figure 2 - Figure supplement 4**

**InceptionV3 (CNN) + LSTM**

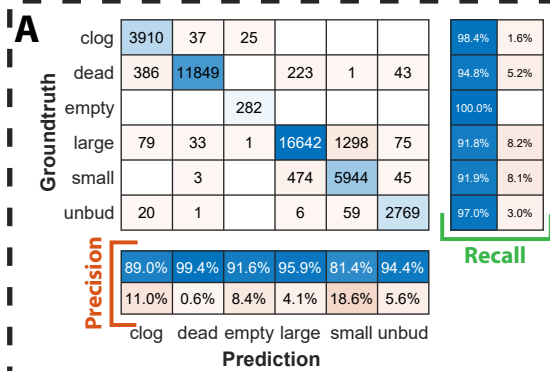

**InceptionResnetV2 (CNN) + LSTM**

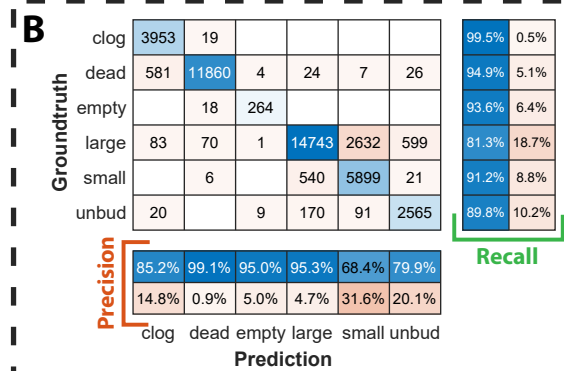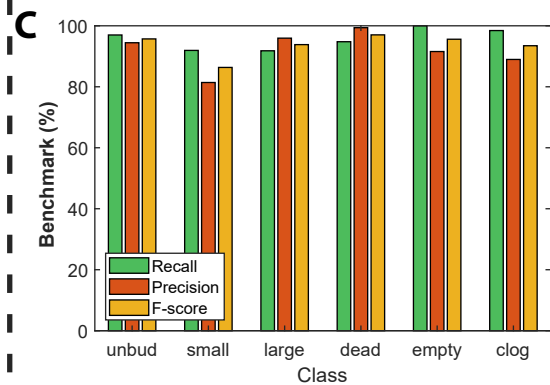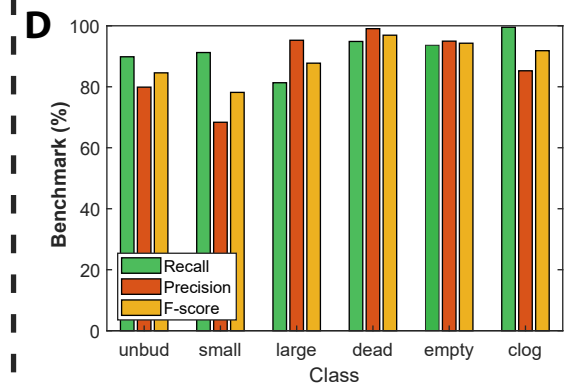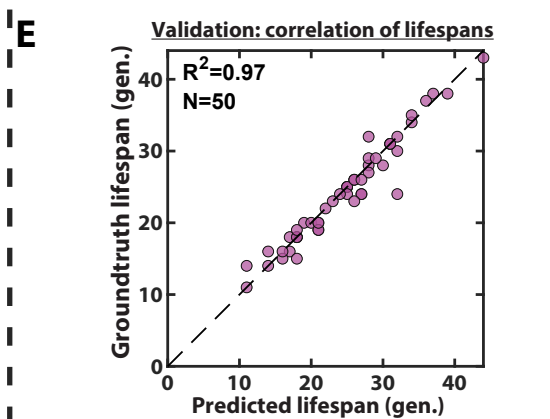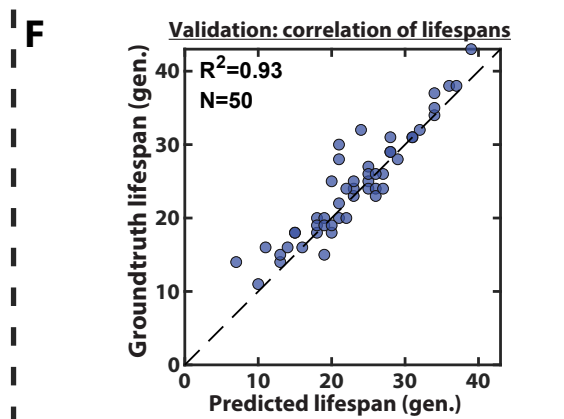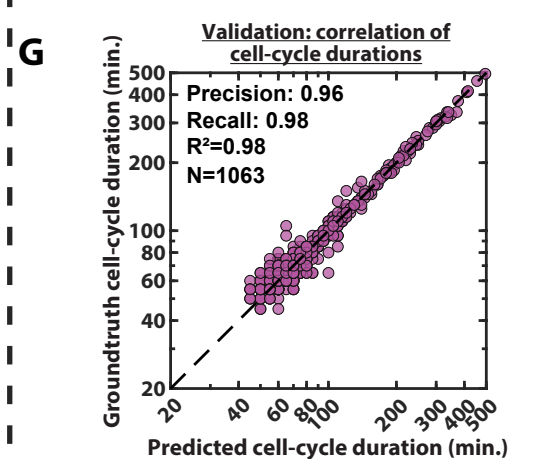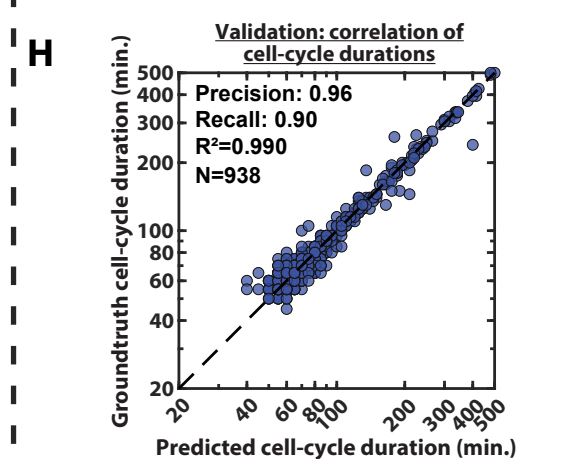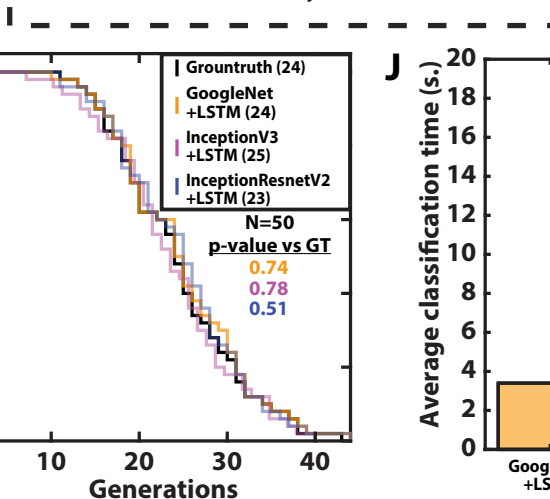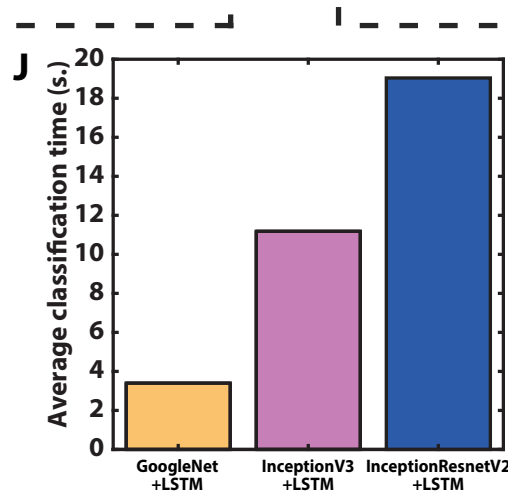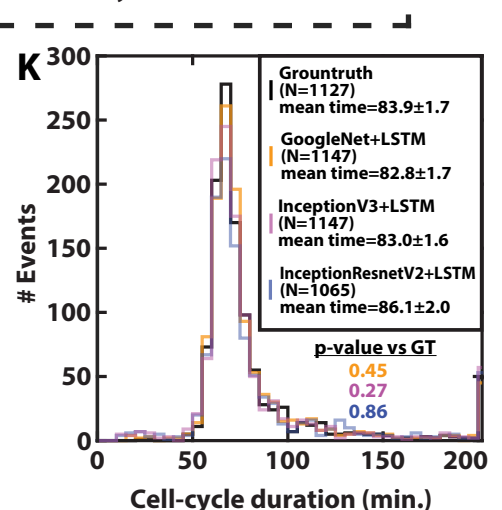

Supplement: supp [file elife_poa_e79519_Figure_2_figure_supplement_4.pdf › elife_poa_e79519_Figure_2_figure_supplement_4.pdf]

**Figure 2 - Figure supplement 5**

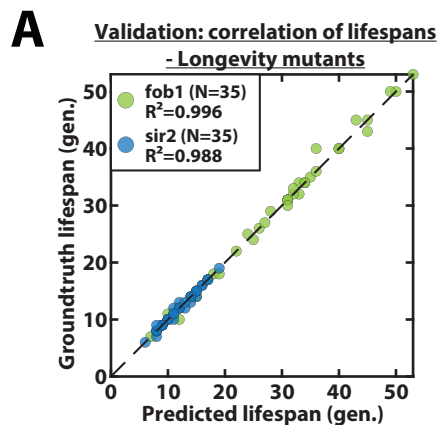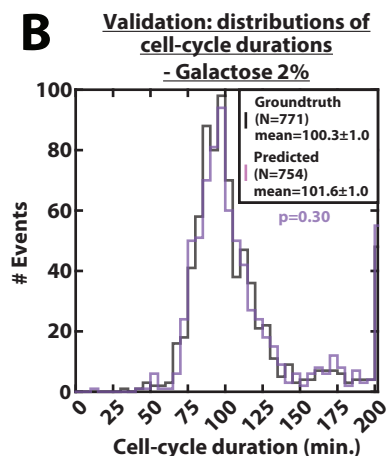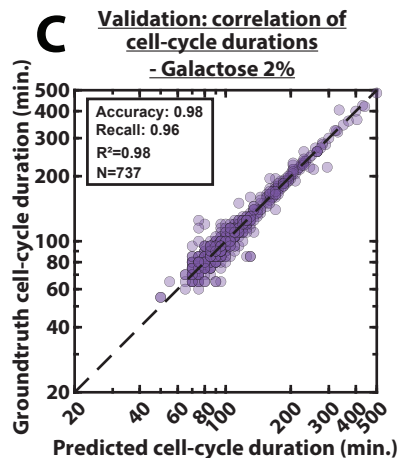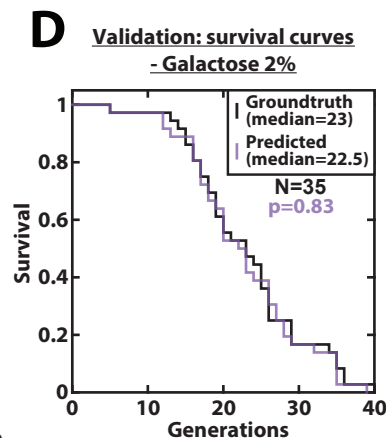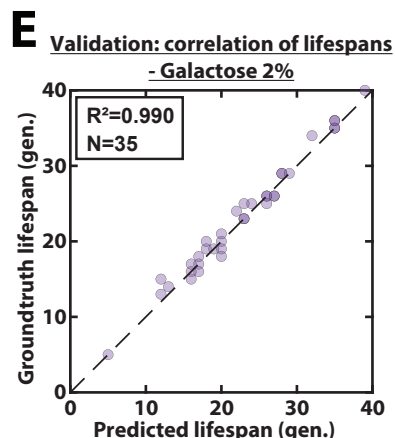

Supplement: supp [file elife_poa_e79519_Figure_2_figure_supplement_5.pdf › elife_poa_e79519_Figure_2_figure_supplement_5.pdf]

**Figure 4 - Figure supplement 1**

**A**

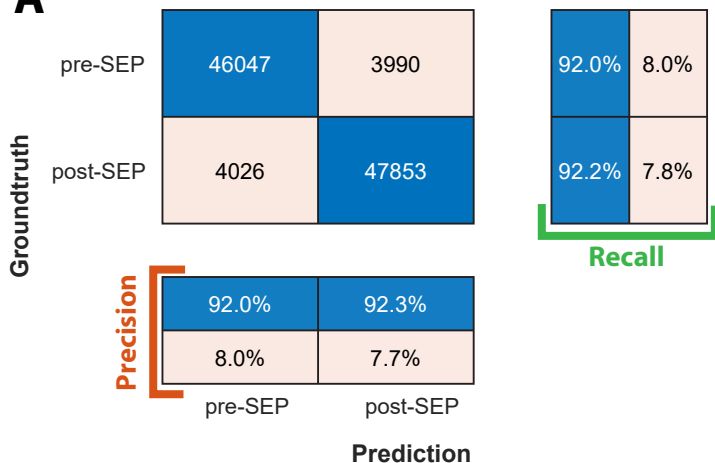

**B**

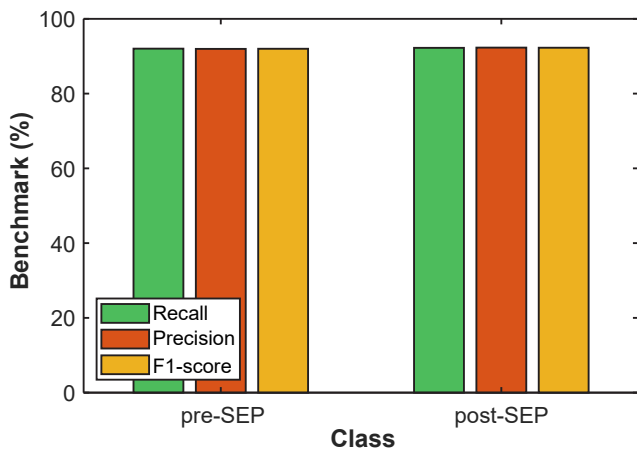

Supplement: supp [file elife_poa_e79519_Figure_4_figure_supplement_1.pdf › elife_poa_e79519_Figure_4_figure_supplement_1.pdf]

**Figure 5 - Figure supplement 1**

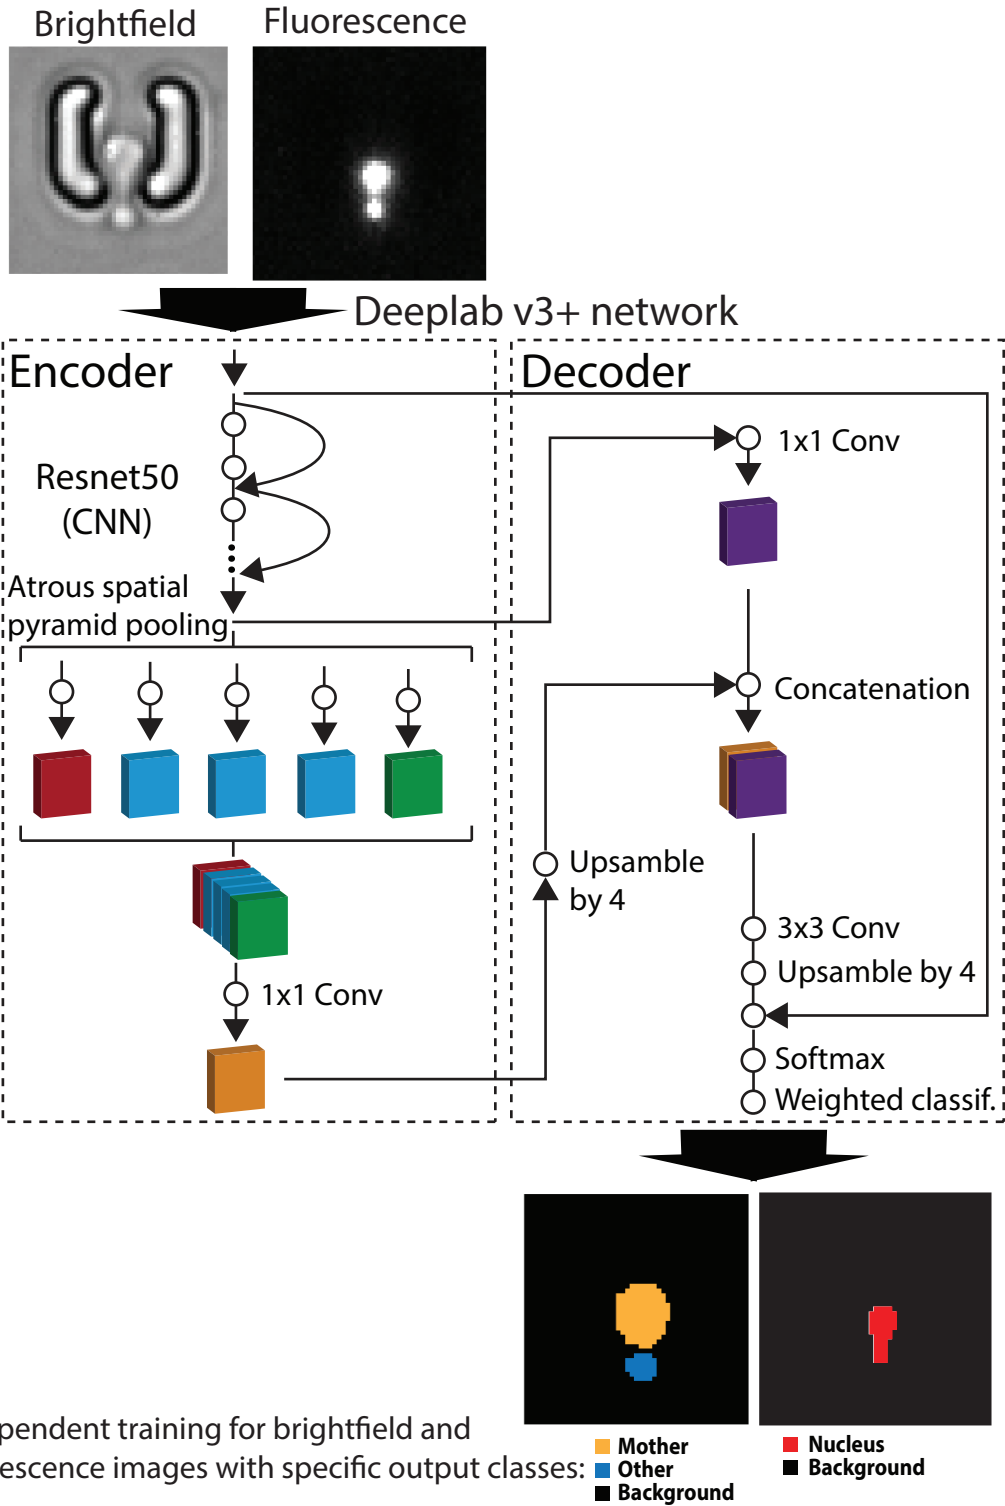

Supplement: supp [file elife_poa_e79519_Figure_5_figure_supplement_1.pdf › elife_poa_e79519_Figure_5_figure_supplement_1.pdf]

**Figure 5 - Figure supplement 2**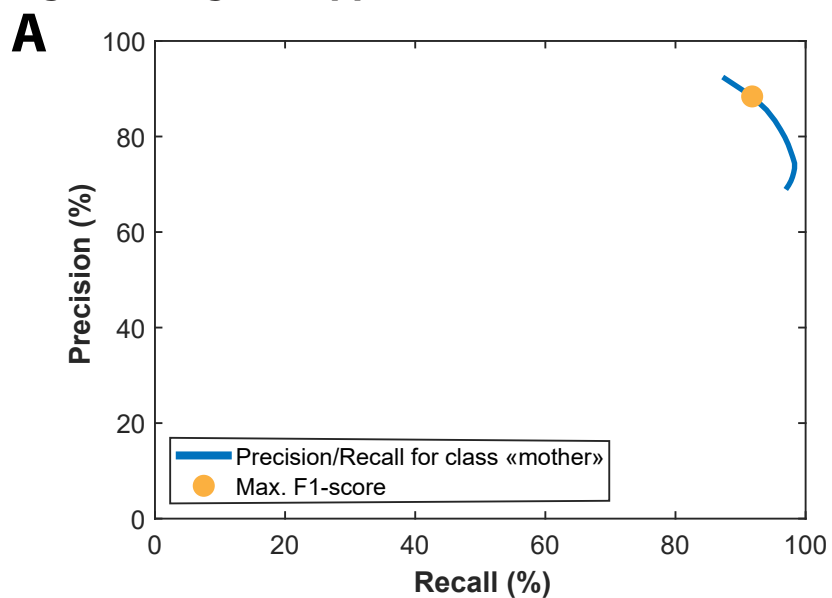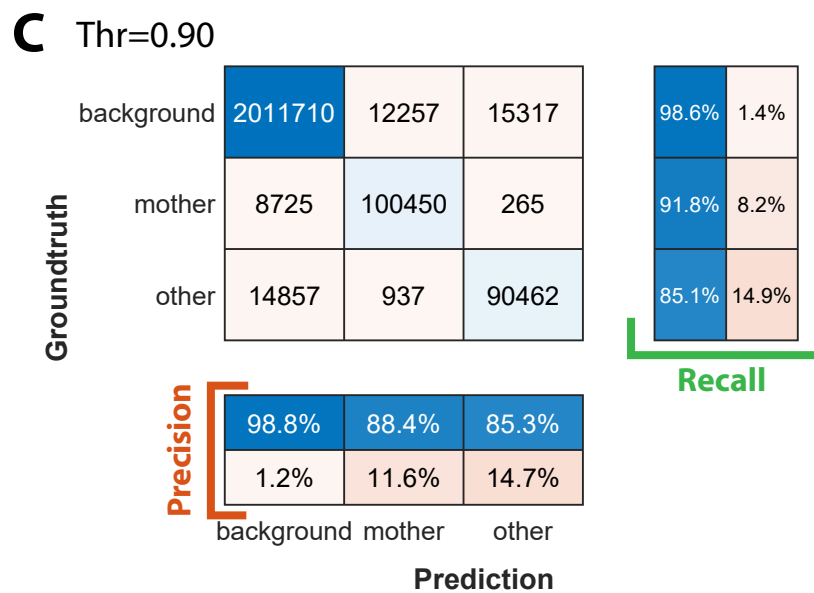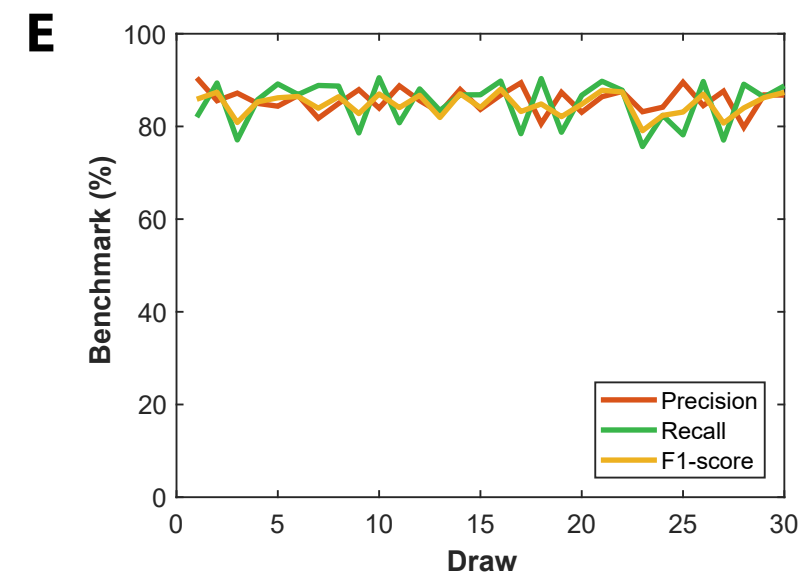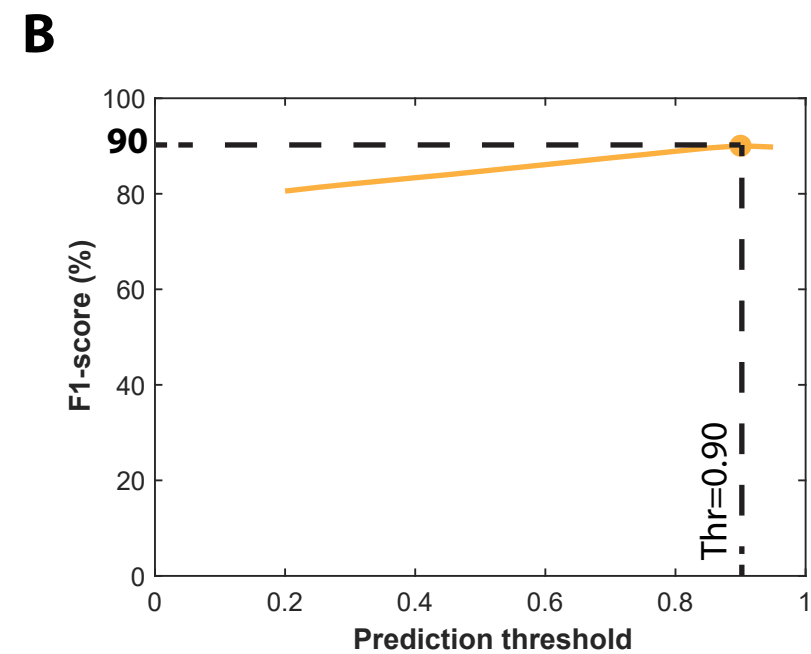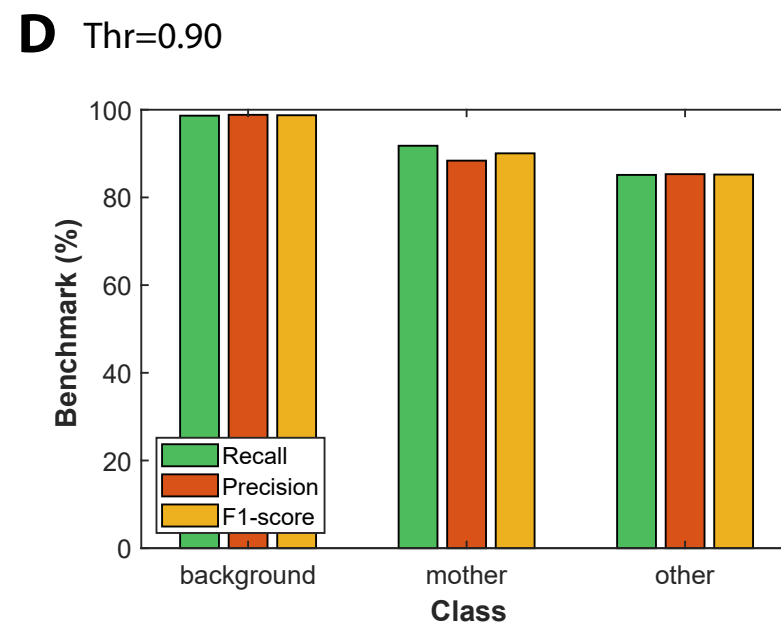

Supplement: supp [file elife_poa_e79519_Figure_5_figure_supplement_2.pdf › elife_poa_e79519_Figure_5_figure_supplement_2.pdf]

**Figure 5 - Figure supplement 3**

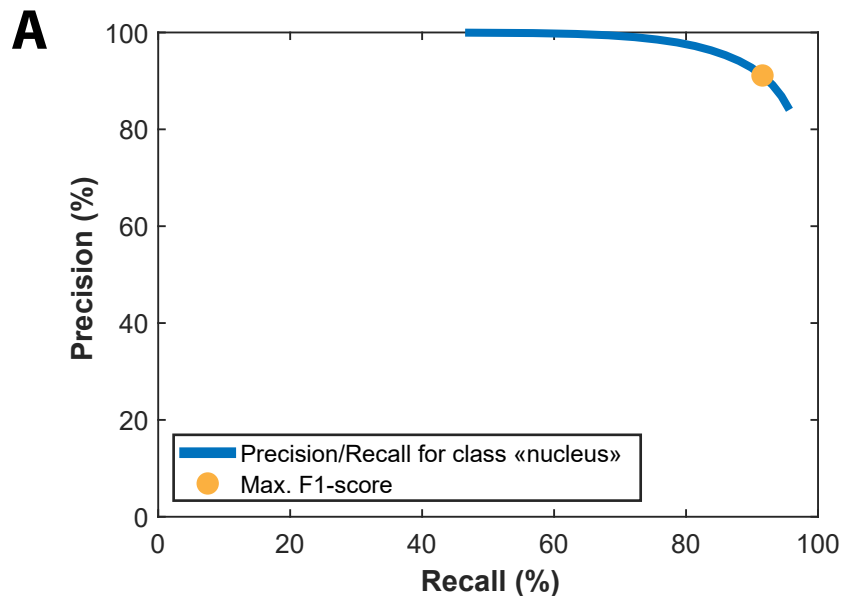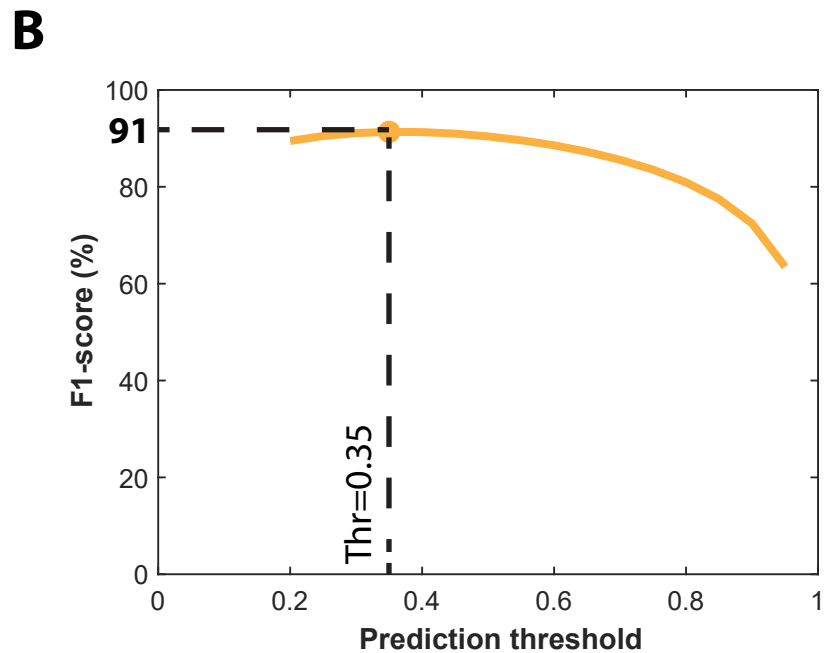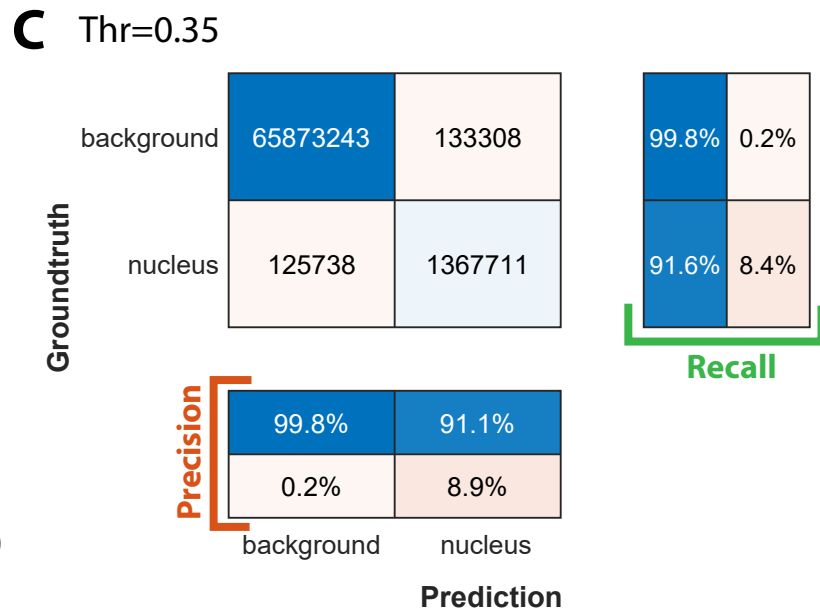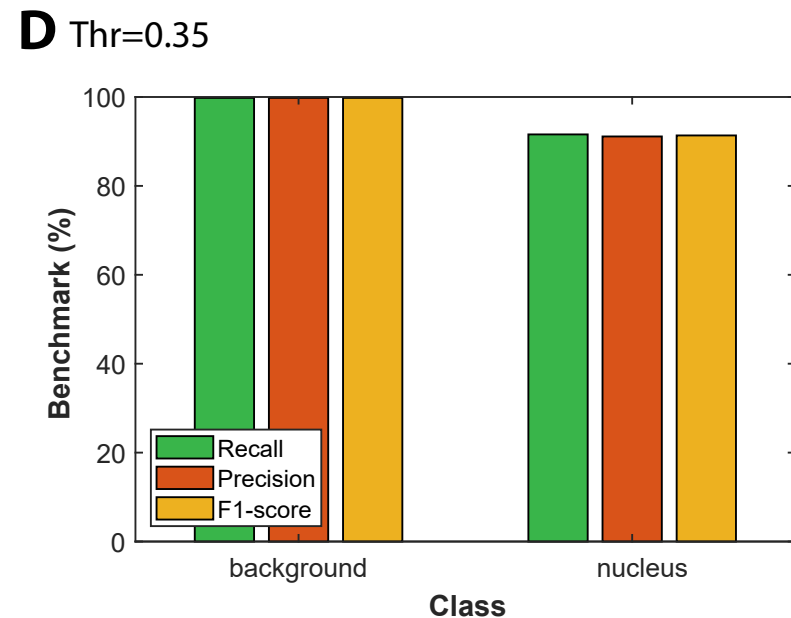

Supplement: supp [file elife_poa_e79519_Figure_5_figure_supplement_3.pdf › elife_poa_e79519_Figure_5_figure_supplement_3.pdf]
